# Supplementary material for: Microarray-Based Sketches of the HERV Transcriptome Landscape
Source: PubMed Central journal article supplement (PMC3386233; doi:10.1371/journal.pone.0040194), 2012-06-28

### 300083\_w-BG956138.jpg

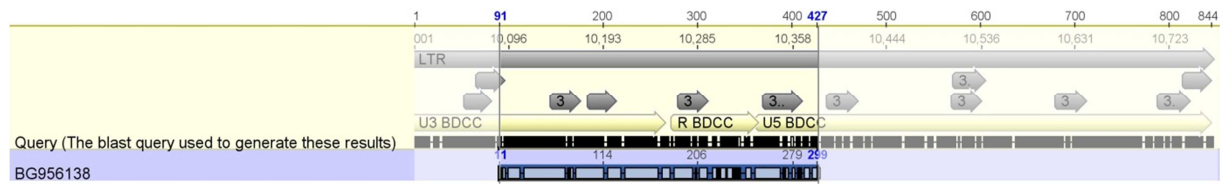

### 400207\_w-AI738459.jpg

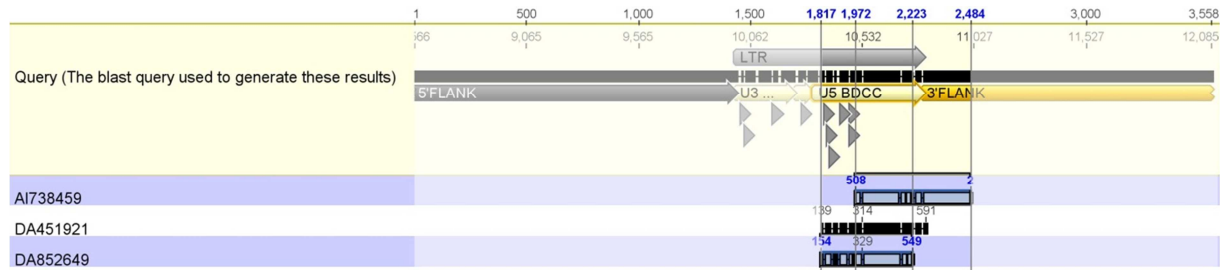

### 400652\_w-AI915245.jpg

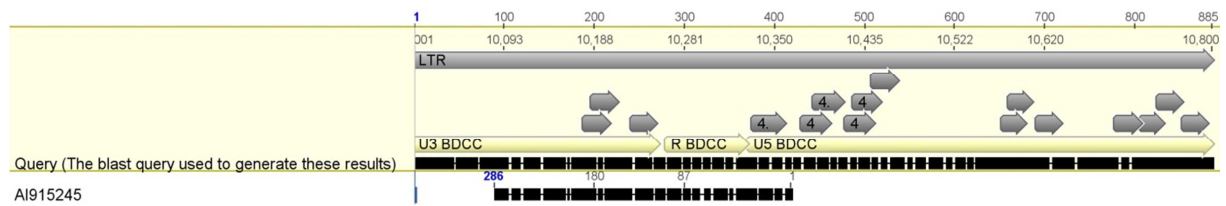

### 500529\_w-DB092475.jpg

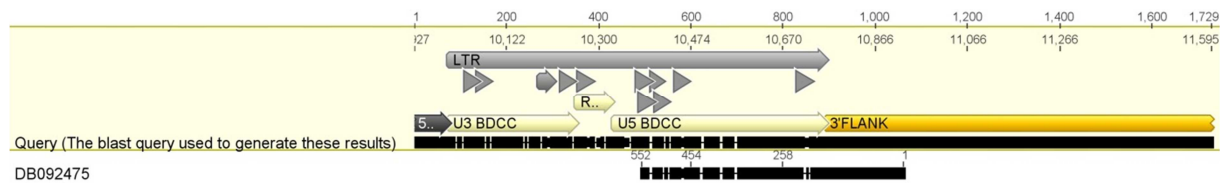

### 500617\_w-BG014730.jpg

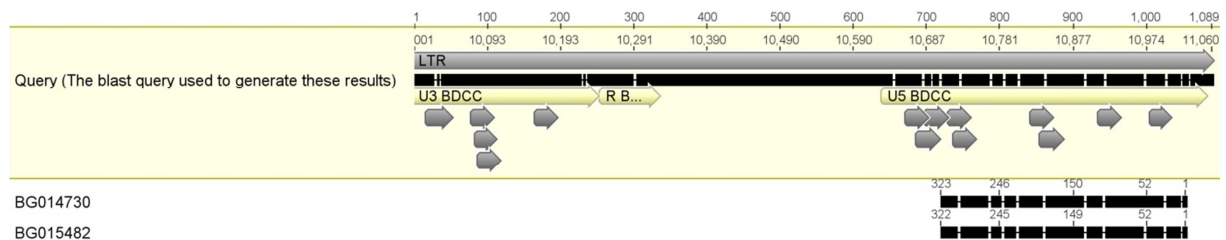

### 600462\_w-CR745334.jpg

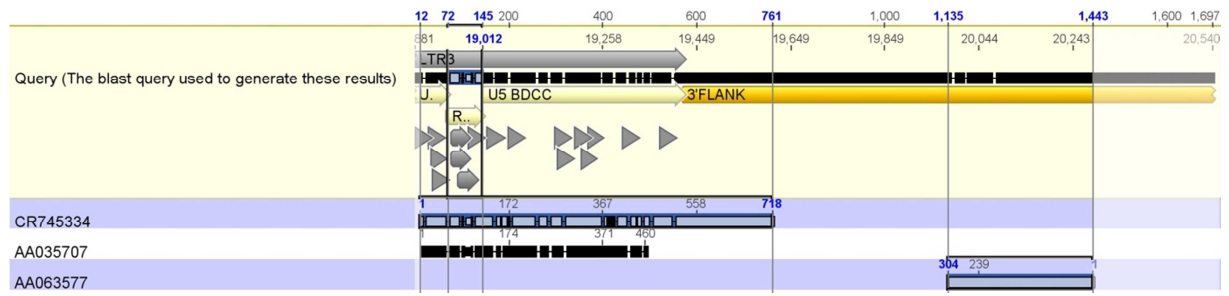

### 700126\_w-BM723292.jpg

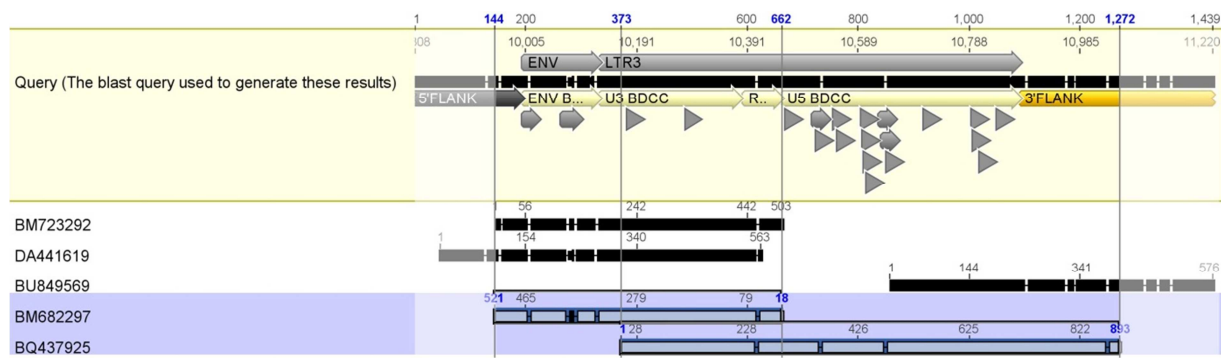

### 700341\_w-BX357209.jpg

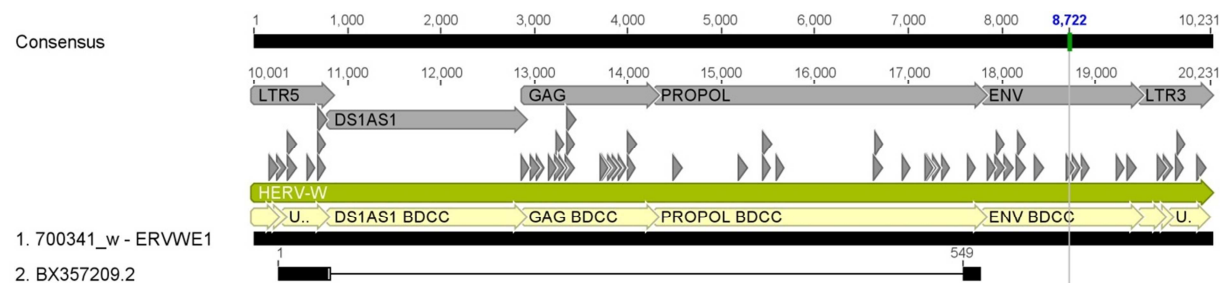

### 700341\_w-ERVWE1\_3LTR.jpg

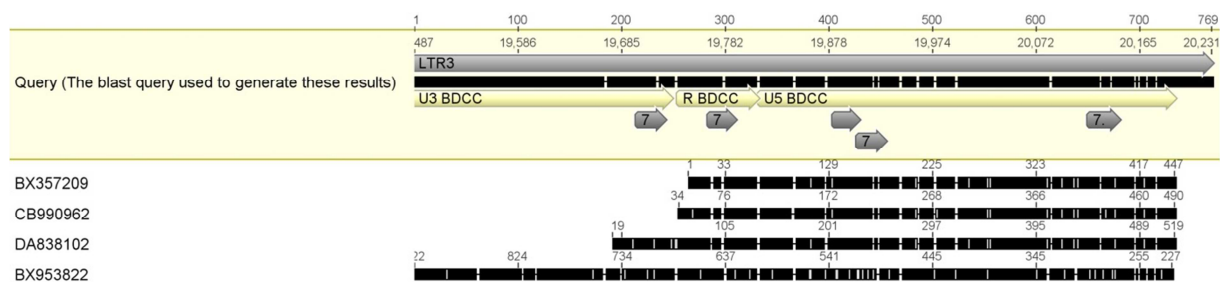

### 700341\_w-ERVWE1\_5LTR.jpg

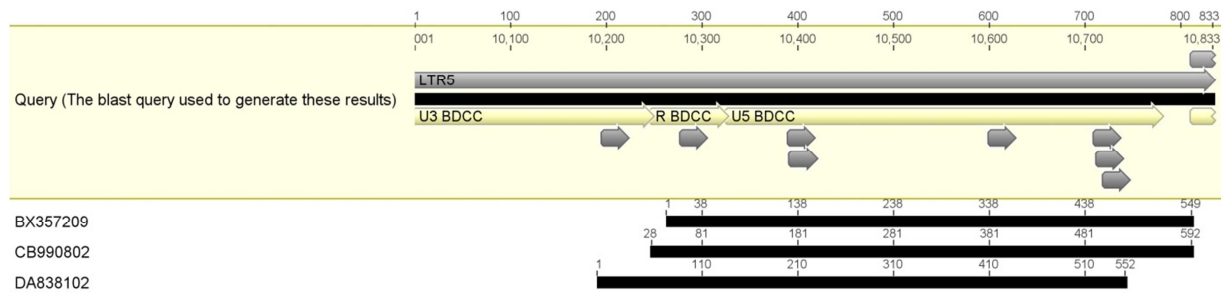

### 800216\_w-BM510276.jpg

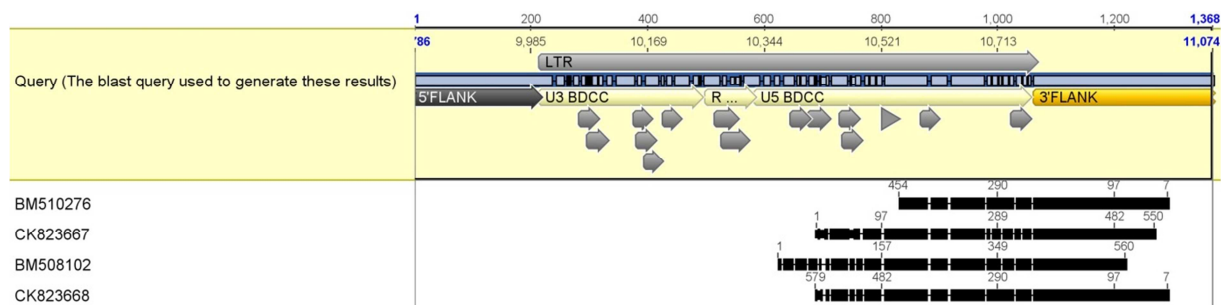

### 900019\_w-AV721910.jpg

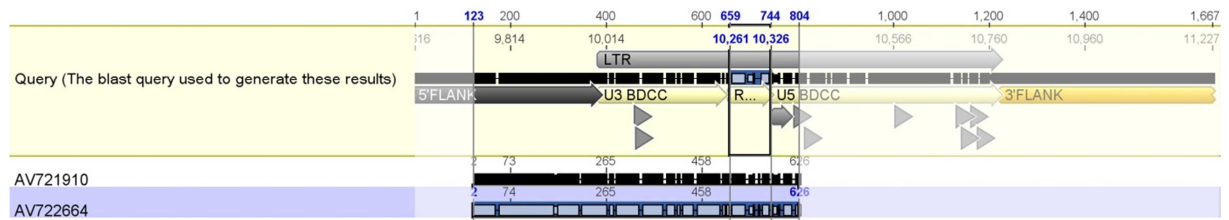

### 900131\_w-BF591249.jpg

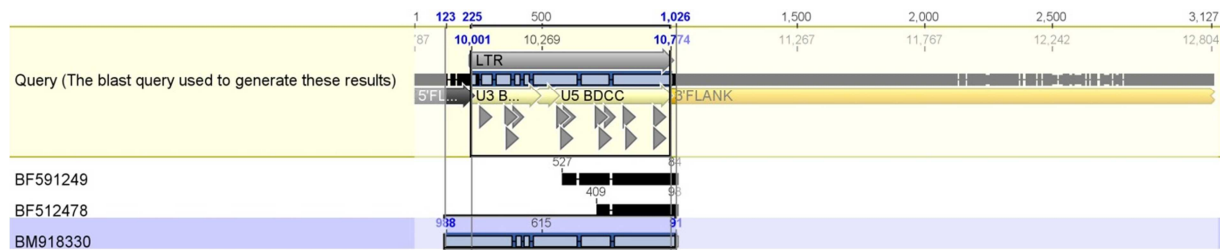

### 1000135\_w-DA383318.jpg

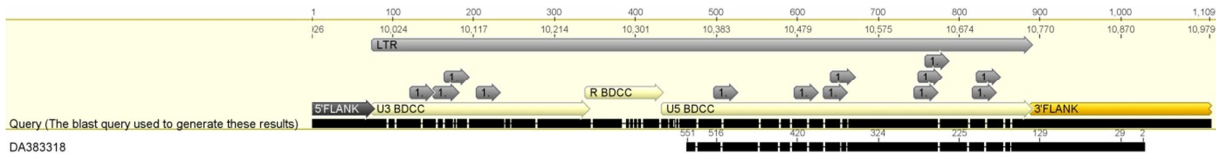

### 1100102\_w-BU621450.jpg

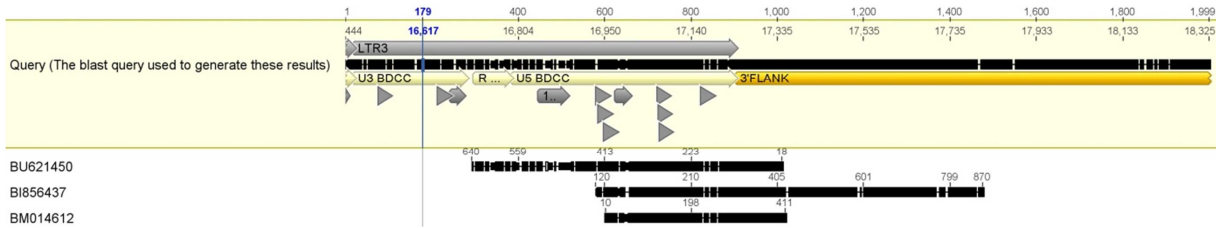

### 1200505\_w-AA781468.jpg

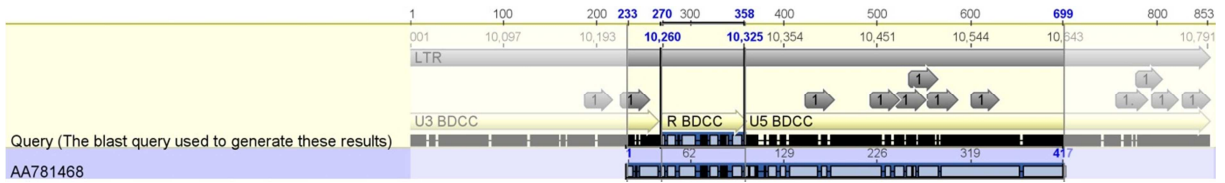

### 1300265\_w-BQ424090.jpg

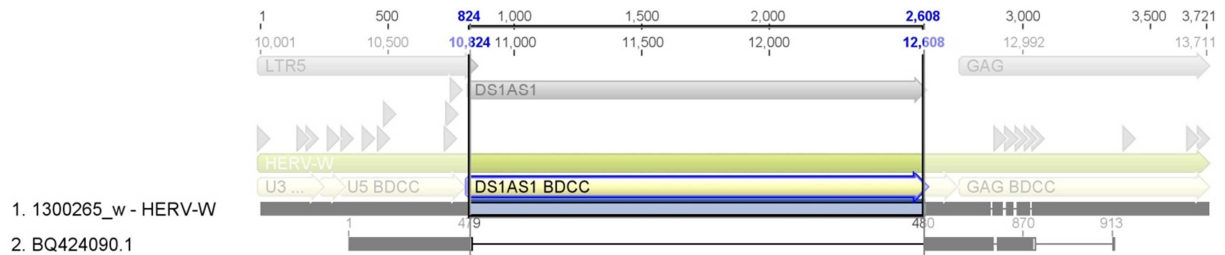

Supplement: pone.0040194.s004.pdf [file pone.0040194.s004.pdf]
