# Supplementary material for: Microarray-Based Sketches of the HERV Transcriptome Landscape
Source: PubMed Central journal article supplement (PMC3386233; doi:10.1371/journal.pone.0040194), 2012-06-28

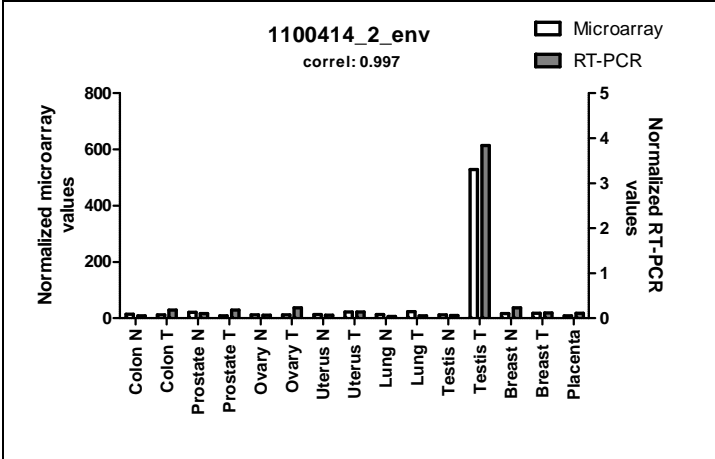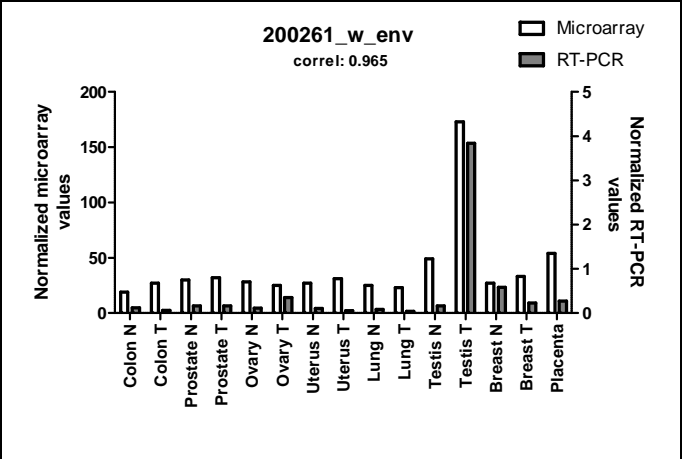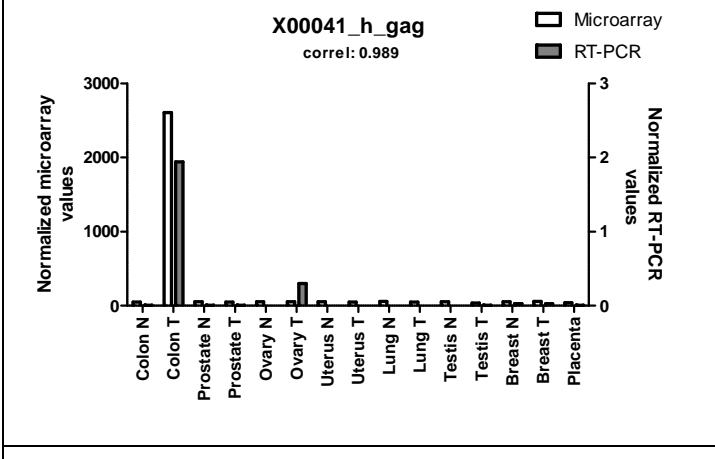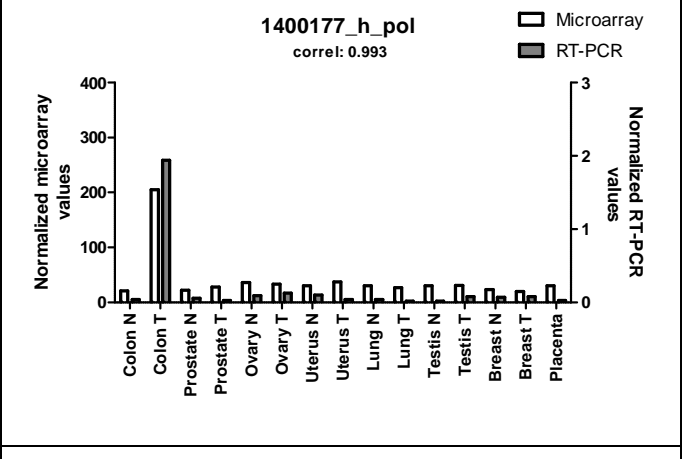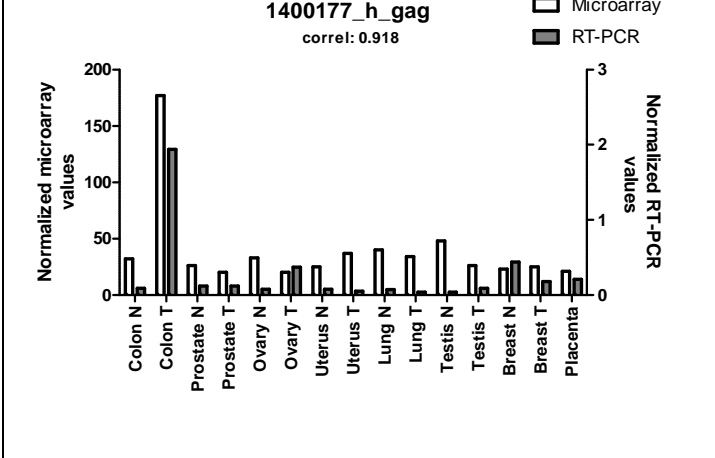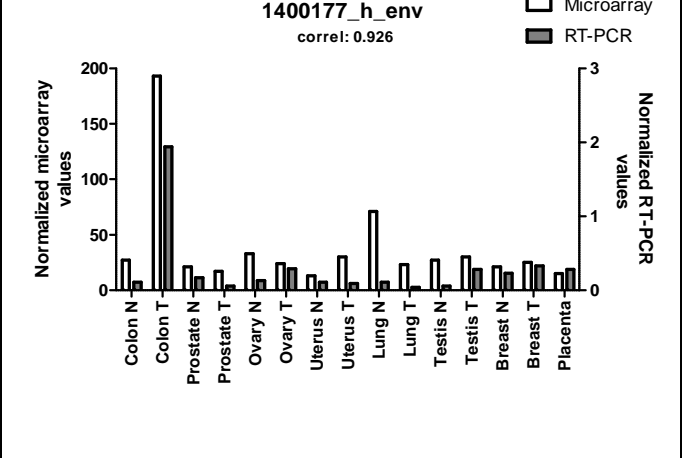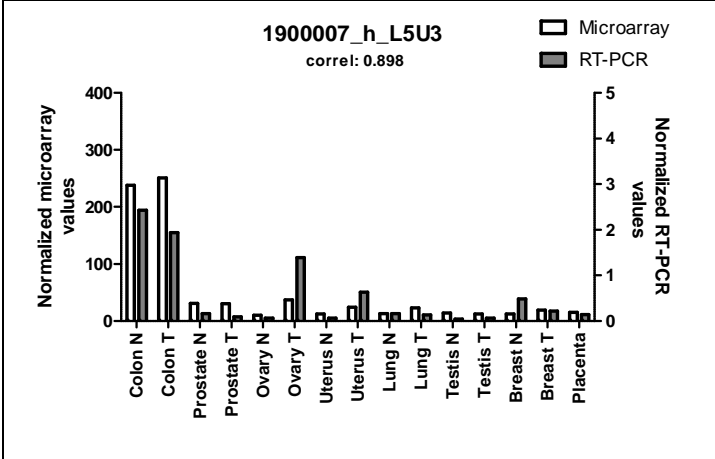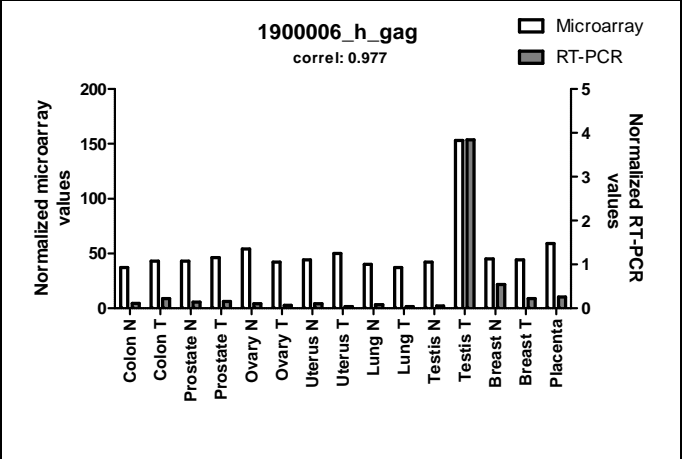

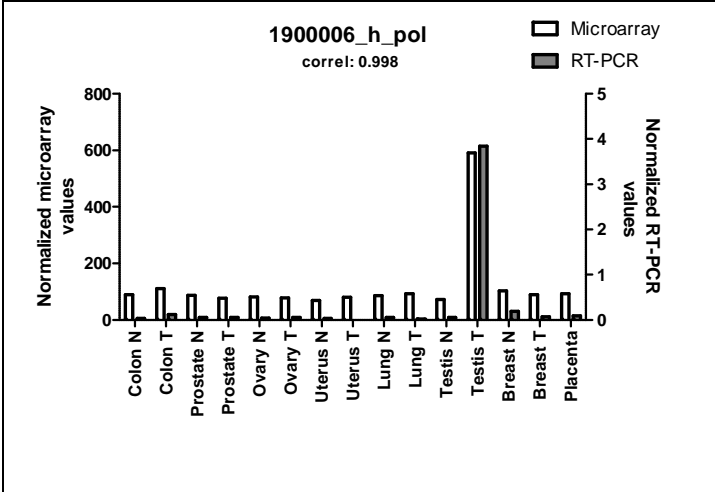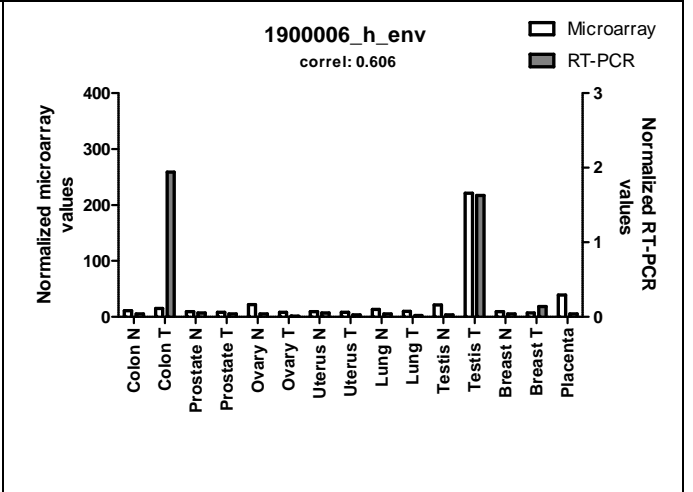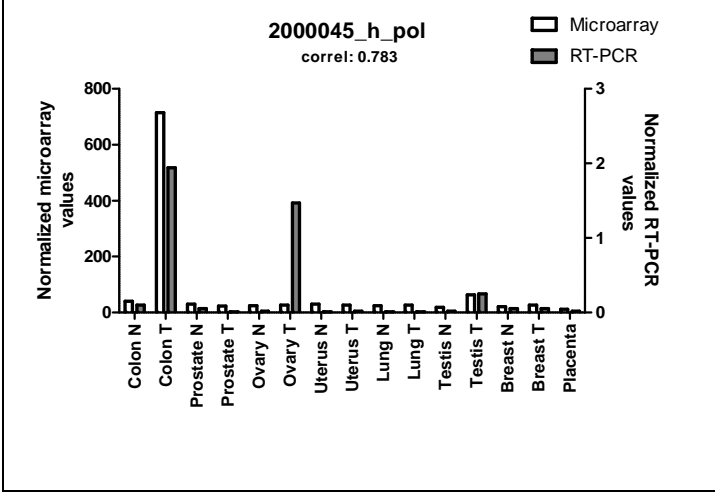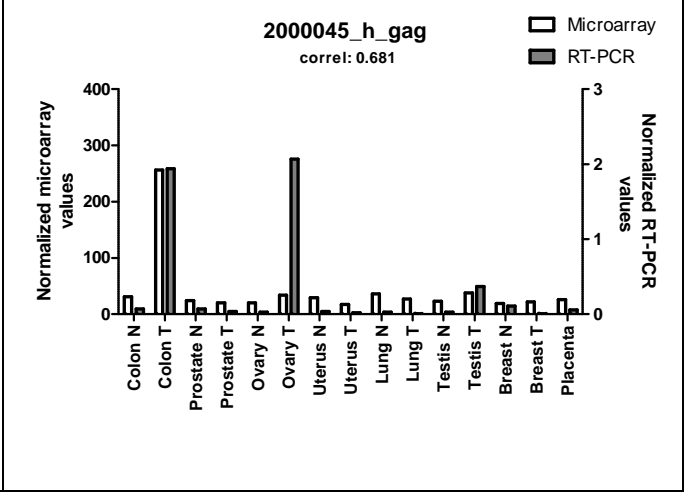

Supplement: pone.0040194.s002.pdf [file pone.0040194.s002.pdf]
