# Supplementary material for: Microarray-Based Sketches of the HERV Transcriptome Landscape
Source: PubMed Central journal article supplement (PMC3386233; doi:10.1371/journal.pone.0040194), 2012-06-28
Supplement: pone.0040194.s005.pdf [file pone.0040194.s005.pdf]

| HERV prototype | # accession of reference sequence | Genomic position               | U3    | R       | U5      | gag       | pol       | env       |
|----------------|-----------------------------------|--------------------------------|-------|---------|---------|-----------|-----------|-----------|
| HERV-W         | AC007566                          | (-) chr 7: 91935220-91945441   | 1-247 | 248-326 | 327-780 | 2887-4311 | 4312-7811 | 7812-9486 |
| HERV-H         | AC009495 <sup>a</sup>             | (-) chr 2: 166272306-166280954 |       |         |         | 1257-1827 | 2404-5957 | 6255-8009 |
|                | AJ289709 <sup>b</sup>             |                                | 1-381 | 382-443 | 444-483 |           |           |           |
| HERV-E 4.1     | M10976                            | (-) chr 19: 20721466-20730278  | 1-424 | 425-451 | 452-495 | 1043-2652 | 2653-6216 | 6239-8254 |
| HERV-FRD       | AC004022                          | (+) chr 7: 94819839-94819943   | 1-493 | 495-607 | 608-714 | 728-1936  | 4771-8279 | 8280-9886 |
| HERV-K HML-2   | Y17832                            | (-) chr 7: 4588583-4598054     | 1-560 | 561-813 | 814-968 | 1112-3112 | 4130-6748 | 6465-8549 |
| HERV-K HML-5   | AC004536                          | (+) chr 6: 117541379-117549142 | 1-280 | 281-323 | 324-482 | 635-1460  | 2792-5355 | 5381-7105 |
