# Supplementary material for: Microarray-Based Sketches of the HERV Transcriptome Landscape
Source: PubMed Central journal article supplement (PMC3386233; doi:10.1371/journal.pone.0040194), 2012-06-28
Supplement: pone.0040194.s006.pdf [file pone.0040194.s006.pdf]

| set of samples | samples     | clinical status                                               | age/sex | paired with | supplier          |
|----------------|-------------|---------------------------------------------------------------|---------|-------------|-------------------|
| colon N        | colon N1    | Adjacent normal                                               | 40/M    | colon T1    | Life Technologies |
|                | colon N2    | Adjacent normal                                               | 62/F    | colon T2    | Clinisciences     |
|                | colon N3    | Adjacent normal                                               | 68/F    | colon T3    | Clinisciences     |
|                | colon N4    | Adjacent normal                                               | 62/F    | colon T4    | Clinisciences     |
| colon T        | colon T1    | Adenocarcinoma                                                | 40/M    | colon N1    | Life Technologies |
|                | colon T2    | Adenocarcinoma, mucinous moderately differentiated            | 62/F    | colon N2    | Clinisciences     |
|                | colon T3    | Adenocarcinoma, mucinous poorly differentiated                | 68/F    | colon N3    | Clinisciences     |
|                | colon T4    | Adenocarcinoma, moderately differentiated                     | 62/F    | colon N4    | Clinisciences     |
| lung N         | lung N1     | Adjacent normal                                               | 72/M    | lung T1     | Life Technologies |
|                | lung N2     | Adjacent normal                                               | 58/M    | lung T2     | CRB Nancy         |
|                | lung N3     | Adjacent normal                                               | 67/M    | lung T3     | CRB Nancy         |
|                | lung N4     | Adjacent normal                                               | 53/M    | lung T4     | CRB Nancy         |
|                | lung N5     | Adjacent normal                                               | 56/M    | lung T5     | CRB Nancy         |
|                | lung N6     | Adjacent normal                                               | 58/M    | lung T6     | CRB Nancy         |
|                | lung N7     | Adjacent normal                                               | 52/M    | lung T7     | CRB Nancy         |
|                | lung N8     | Adjacent normal                                               | 47/M    | lung T8     | CRB Nancy         |
|                | lung N9     | Adjacent normal                                               | 78/M    | lung T9     | CRB Nancy         |
|                | lung N10    | Adjacent normal                                               | 63/M    | lung T10    | CRB Nancy         |
| lung T         | lung T1     | Squamous cell carcinoma                                       | 72/M    | lung N1     | Life Technologies |
|                | lung T2     | Epidermoid, T1N0                                              | 58/M    | lung N2     | CRB Nancy         |
|                | lung T3     | Epidermoid, T1N0                                              | 67/M    | lung N3     | CRB Nancy         |
|                | lung T4     | Epidermoid, T2N0                                              | 53/M    | lung N4     | CRB Nancy         |
|                | lung T5     | Epidermoid, T1N0                                              | 56/M    | lung N5     | CRB Nancy         |
|                | lung T6     | Epidermoid, T2N1                                              | 58/M    | lung N6     | CRB Nancy         |
|                | lung T7     | Epidermoid, T2N1                                              | 52/M    | lung N7     | CRB Nancy         |
|                | lung T8     | Epidermoid, T2N0                                              | 47/M    | lung N8     | CRB Nancy         |
|                | lung T9     | Epidermoid, T1N0                                              | 78/M    | lung N9     | CRB Nancy         |
|                | lung T10    | Epidermoid, T2N1                                              | 63/M    | lung N10    | CRB Nancy         |
| breast N       | breast N1   | Adjacent normal                                               | 56/F    | breast T1   | Clinisciences     |
|                | breast N2   | Adjacent normal                                               | 41/F    | breast T2   | Clinisciences     |
|                | breast N3   | Adjacent normal                                               | 63/F    | breast T3   | Clinisciences     |
|                | breast N4   | Adjacent normal                                               | 50/F    | breast T4   | Clinisciences     |
|                | breast N5   | Adjacent normal                                               | 50/F    | breast T5   | Clinisciences     |
|                | breast N6   | Adjacent normal                                               | 47/F    | breast T6   | Clinisciences     |
|                | breast N7   | Adjacent normal                                               | 53/F    | breast T7   | Clinisciences     |
|                | breast N8   | Adjacent normal                                               | 58/F    | breast T8   | Clinisciences     |
| breast T       | breast T1   | Invasive ductal carcinoma                                     | 56/F    | breast N1   | Clinisciences     |
|                | breast T2   | Invasive ductal carcinoma                                     | 41/F    | breast N2   | Clinisciences     |
|                | breast T3   | Invasive ductal carcinoma                                     | 63/F    | breast N3   | Clinisciences     |
|                | breast T4   | Invasive ductal carcinoma                                     | 50/F    | breast N4   | Clinisciences     |
|                | breast T5   | Invasive ductal carcinoma                                     | 50/F    | breast N5   | Clinisciences     |
|                | breast T6   | Invasive ductal carcinoma                                     | 47/F    | breast N6   | Clinisciences     |
|                | breast T7   | Invasive lobular carcinoma, moderately differentiated         | 53/F    | breast N7   | Clinisciences     |
|                | breast T8   | Invasive ductal carcinoma, poorly differentiated              | 58/F    | breast N8   | Clinisciences     |
| ovary N        | ovary N1    | Adjacent normal                                               | 32/F    | ovary T1    | Life Technologies |
|                | ovary N2    | Adjacent normal                                               | 71/F    | ovary T2    | Clinisciences     |
|                | ovary N3    | Adjacent normal                                               | 20/F    | ovary T3    | Clinisciences     |
|                | ovary N4    | Adjacent normal                                               | 40/F    | ovary T4    | Clinisciences     |
| ovary T        | ovary T1    | Papillary cystadeno carcinoma                                 | 32/F    | ovary N1    | Life Technologies |
|                | ovary T2    | Right ovary endometrioid carcinoma, moderately differentiated | 71/F    | ovary N2    | Clinisciences     |
|                | ovary T3    | Yolk sac cystadenoma                                          | 20/F    | ovary N3    | Clinisciences     |
|                | ovary T4    | Mucinous cystodeno carcinoma                                  | 40/F    | ovary N4    | Clinisciences     |
| prostate N     | prostate N1 | Adjacent normal                                               | 82/M    | prostate T1 | Clinisciences     |
|                | prostate N2 | Adjacent normal                                               | 53/M    | prostate T2 | Life Technologies |
|                | prostate N3 | Adjacent normal                                               | 73/M    | prostate T3 | Life Technologies |
|                | prostate N4 | Adjacent normal                                               | 56/M    | prostate T4 | CH Lyon Sud       |
|                | prostate N5 | Adjacent normal                                               | 63/M    | prostate T5 | CH Lyon Sud       |
|                | prostate N6 | Adjacent normal                                               | 73/M    | prostate T6 | CH Lyon Sud       |
|                | prostate N7 | Adjacent normal                                               | 66/M    | prostate T7 | CH Lyon Sud       |
|                | prostate N8 | Adjacent normal                                               | 68/M    | prostate T8 | CH Lyon Sud       |
| prostate T     | prostate T1 | Prostate cancer                                               | 82/M    | prostate N1 | Clinisciences     |
|                | prostate T2 | Adenocarcinoma, well differentiated                           | 53/M    | prostate N2 | Life Technologies |
|                | prostate T3 | Adenocarcinoma, well to poorly differentiated Gleason 7       | 73/M    | prostate N3 | Life Technologies |
|                | prostate T4 | Prostate adenocarcinoma, pT3bN1 Gleason 7                     | 56/M    | prostate N4 | CH Lyon Sud       |
|                | prostate T5 | Prostate adenocarcinoma, pT2cN0 Gleason 7                     | 63/M    | prostate N5 | CH Lyon Sud       |
|                | prostate T6 | Prostate adenocarcinoma, pT2cN0 Gleason 6                     | 73/M    | prostate N6 | CH Lyon Sud       |
|                | prostate T7 | Prostate adenocarcinoma, pT2cN0 Gleason 7                     | 66/M    | prostate N7 | CH Lyon Sud       |
|                | prostate T8 | Prostate adenocarcinoma, pT2cN0 Gleason 7                     | 68/M    | prostate N8 | CH Lyon Sud       |
| testis N       | testis N1   | Adjacent normal                                               | 33/M    | testis T1   | Life Technologies |
|                | testis N2 * | Adjacent normal                                               | 26/M    | testis T2   | Life Technologies |
|                | testis N3 * | Adjacent normal                                               | 30/M    | testis T3   | Clinisciences     |
| testis T       | testis T1   | Seminoma                                                      | 33/M    | testis N1   | Life Technologies |
|                | testis T2 * | Seminoma, T3N1                                                | 26/M    | testis N2   | Life Technologies |
|                | testis T3 * | Seminoma                                                      | 30/M    | testis N3   | Clinisciences     |
| uterus N       | uterus N1   | Adjacent normal                                               | 47/F    | uterus T1   | Life Technologies |
|                | uterus N2   | Adjacent normal                                               | 49/F    | uterus T2   | Clinisciences     |
|                | uterus N3   | Adjacent normal                                               | 55/F    | uterus T3   | Clinisciences     |
|                | uterus N4   | Adjacent normal                                               | 41/F    | uterus T4   | Clinisciences     |
| uterus T       | uterus T1   | Choriocarcinoma                                               | 47/F    | uterus N1   | Life Technologies |
|                | uterus T2   | Adenocarcinoma, poorly differentiated                         | 49/F    | uterus N2   | Clinisciences     |
|                | uterus T3   | Adenocarcinoma, poorly differentiated                         | 55/F    | uterus N3   | Clinisciences     |
|                | uterus T4   | Endometrioid adenocarcinoma                                   | 41/F    | uterus N4   | Clinisciences     |
| placenta       | placenta N1 | Normal term                                                   | 30/F    | no          | Life Technologies |
