# Supplementary material for: Microarray-Based Sketches of the HERV Transcriptome Landscape
Source: PubMed Central journal article supplement (PMC3386233; doi:10.1371/journal.pone.0040194), 2012-06-28
Supplement: pone.0040194.s009.pdf [file pone.0040194.s009.pdf]

| colon T    |                        |
|------------|------------------------|
| <i>EST</i> | <i>Normalized hits</i> |
| colon      | 65,7                   |
| lung       | 39,3                   |
| ovary      | 35,6                   |
| placenta   | 21,0                   |
| prostate   | 11,7                   |
| testis     | 28,2                   |

| ovary T    |                        |
|------------|------------------------|
| <i>EST</i> | <i>Normalized hits</i> |
| colon      | 48,0                   |
| lung       | 55,0                   |
| ovary      | 58,8                   |
| placenta   | 28,4                   |
| prostate   | 35,8                   |
| testis     | 43,0                   |

| placenta N |                        |
|------------|------------------------|
| <i>EST</i> | <i>Normalized hits</i> |
| colon      | 12,0                   |
| lung       | 14,8                   |
| ovary      | 16,9                   |
| placenta   | 20,6                   |
| prostate   | 7,8                    |
| testis     | 17,9                   |

| placenta N + testis T |                        |
|-----------------------|------------------------|
| <i>EST</i>            | <i>Normalized hits</i> |
| colon                 | 17,7                   |
| lung                  | 16,1                   |
| ovary                 | 32,3                   |
| prostate              | 16,1                   |
| placenta + testis     | 48,0                   |

| testis N   |                        |
|------------|------------------------|
| <i>EST</i> | <i>Normalized hits</i> |
| colon      | 44,1                   |
| lung       | 39,2                   |
| ovary      | 31,4                   |
| placenta   | 27,5                   |
| prostate   | 34,6                   |
| testis     | 40,5                   |

| testis T   |                        |
|------------|------------------------|
| <i>EST</i> | <i>Normalized hits</i> |
| colon      | 17,6                   |
| lung       | 13,3                   |
| ovary      | 10,0                   |
| placenta   | 10,6                   |
| prostate   | 7,3                    |
| testis     | 14,6                   |

| lung N     |                        |
|------------|------------------------|
| <i>EST</i> | <i>Normalized hits</i> |
| colon      | 53,8                   |
| lung       | 46,7                   |
| ovary      | 51,4                   |
| placenta   | 33,8                   |
| prostate   | 57,3                   |
| testis     | 62,0                   |

| prostate T |                        |
|------------|------------------------|
| <i>EST</i> | <i>Normalized hits</i> |
| colon      | 17,1                   |
| lung       | 13,6                   |
| ovary      | 22,9                   |
| placenta   | 15,8                   |
| prostate   | 20,3                   |
| testis     | 22,4                   |
