# Supplementary material for: Microarray-Based Sketches of the HERV Transcriptome Landscape
Source: PubMed Central journal article supplement (PMC3386233; doi:10.1371/journal.pone.0040194), 2012-06-28
Supplement: pone.0040194.s010.pdf [file pone.0040194.s010.pdf]

| Target         | Tm (°C) | Forward primer (5' to 3')   | Reverse primer (5' to 3')   | Application       |
|----------------|---------|-----------------------------|-----------------------------|-------------------|
| G6PD           | 55      | TGCAGATGCTGTGTCTGG          | CGTACTGGCCAGGACC            | normalization     |
| GAPDH          | 55      | GAAGGTGAAGTCCGGAGTC         | GAAGATGGTGATGGGATTTTC       | normalization     |
| HPRT           | 55      | GTGATGATGAACCAGGTTATGACCTTG | CTACAGTCATAGGAATGGATCTATCAC | normalization     |
| 1100414_2_env  | 57      | GGCCTATGTGCCTTTCCC GCC      | TCCTGGTGCTGTCCCTAAGCAA      | tropism           |
| 1100414_2_L5U3 | 59      | AGCTCAACAACACTTCCATGTCTCA   | TCCTGCACCGCCCTTAATCCATTCA   | promoter function |
| 1100414_2_L5U5 | 57      | TGGTTCCCCGGTTCCCCTTATTTCT   | CCTACACACCTGTGGGTGTTTCTCA   | promoter function |
| 200261_w_env   | 57      | TTGTCTCTTCTGGAATCAAAGCTGC   | TGCAATTGAGATTTCTCGGGAGGG    | tropism           |
| 200261_w_L5U3  | 61      | GCTCACACCCAACCAATCAGAGAGC   | CTGGAAGGCCTGGGTTTATATCGCA   | promoter function |
| 200261_w_L5U5  | 55      | ATAAACTCACCTGGCATGGCCAGC    | ACTTCCAAGATGGTGGCTAGCAGCT   | promoter function |
| X00041_h_gag   | 61      | CAGGCGTTGCTGAGTGTGTCTAATC   | TGGAGCCTGAGGAAGAATTGGGACC   | tropism           |
| 1400177_h_pol  | 55      | CACGGTAGAAGGTAGTAAGCGCGTC   | GCGGCAATGAGATGTGGCTGTAGTC   | tropism           |
| 1400177_h_gag  | 61      | TTCTAGTCTTTGTCCCAATGCAA     | AGGTGTGAGGAGGCGAGGTGATAAA   | tropism           |
| 1400177_h_env  | 61      | TCCAAAACCATATGCAGTCCATCAC   | AGCTGAAGGGAGGTCTTGTGGTAAG   | tropism           |
| 1900007_h_L5U3 | 57      | ATATCCCCTACGACCGGCTCATATA   | TGGGGCAGAAACAGATCACAATGGT   | tropism           |
| 1900006_h_gag  | 59      | GGTGCCTGAAGTCCATCAGTCCCTT   | GCAGGAGCAGAGGCTGAGGAAGAAT   | tropism           |
| 1900006_h_pol  | 65      | TCCCAGCCCAAAGCTTCCCTCACG    | GCGTTGAGCGGGTAAGGGTGATTA    | tropism           |
| 1900006_h_env  | 61      | CCACCGAGGCCTTGACTGACT       | GGGAGGGCCAGGACATCCAA        | tropism           |
| 2000045_h_pol  | 59      | TACAGCATGGGCACCTATAAACTCT   | TAAGTGAAGGCAAAGAGAGGCTGGG   | tropism           |
| 2000045_h_gag  | 59      | CCCAAGCGCGCTGAGTCTT         | TGGGATGAAGGGAGGGGAGGC       | tropism           |
| 2000062_2_L5U3 | 55      | TGCTGGCAGAAACAAGTGTGTGT     | GGTTCCTGTGGCCTCTGCAGTGAT    | promoter function |
| 2000062_2_L5U5 | 63      | GCGTGGTCCCTCCATGCTGAGC      | AAGGGTGGCCAGTGTCTCCACCT     | promoter function |
