# Supplementary material for: Microarray-Based Sketches of the HERV Transcriptome Landscape
Source: PLoS One. 2012 Jun 28;7(6):e40194. doi: 10.1371/journal.pone.0040194 (PMC3386233; doi:10.1371/journal.pone.0040194)
Supplement: Table S4 — Identification of HML-2 repetitive elements characterized by independent methods. From left to right the genomic location (NCBI 36/hg18), the individual HML-2 locus sequence name, the tropism of expression deduced from the microarrays, the differential expression and the LTR functions as depicted in Table S3, the references from which data were obtained taking into consideration either EST analysis [59], genomic repeat expression monitoring (GREM) for experimental genome-wide identification of promoter-active repetitive elements [62], PCR-sequencing [48] or array-based approach [61] are given. The original designation of the HERV loci is given for each study. We added April 2012 EST query information obtained using the method developed in Table S7. Statistics concerning this analysis are given at the bottom of the table and include, for each study, the number of elements, the number of shared elements, the number of active elements and the correlation between our work and each individual study. (XLS) [file pone.0040194.s008.xls]

## Sheet: Feuil1
HERV sequence				Tropism										DEG							LTR functions					Literature					EST putative informations (april 2012)
genomic loc. (NCBI36/hg18)	strand	seq id HERV-K HML-2 family		lung N	colon T	testis T	testis N	Pr-Ov-Ut	prostate T	ovary T	placenta N	placenta N-testis T		testis	colon	lung	ovary	prostate	breast		promoter	polyA	readthrough	silent		Stauffer 2004 ESTs	Buzdin 2006 GREM	Flockerzi 2008	Gimenez 2010		best EST score	EST ID	Lenght	Coverage	Region covered
chr 1: 13551727-13561236	+	100059_2														x					x			x		1p36 (0 EST)					90.1 99.3	GD259499 GD259499	670 670	3-665 1-670	U3-R-U5 U3-R-U5
chr 1: 164841239-164846882	-	100627_2																						x		1q23 (0 EST)					99.8	DB284076	552	4-552	pol-env
chr 3: 9867038-9871236	-	300035_2																			x					3p25 (0 EST)		c3_A			93.5	BQ216036	818	602-1	U3-R
chr 3: 102893427-102902549	+	300408_2															x					x				C3_NT005863.11					99 99.9	EL955112 DR002148	596 743	20-596 8-743	U3 (5'LTR) gag
chr 3: 127091992-127101129	+	300509_2												x			x					x				C3_NT022411.11		c3_C			97.8 99.8	CR998259 FN806831	762 637	759-38 1-637	5'LTR gag
chr 3: 149764167-149767943	-	300619_2				x								x			x											c3_D			99.4	DA411247	665	665-2	Gag
chr 3: 186765708-186772209	-	300777_2												x	x		x											c3_E			97.5	BF684025	973	619-2	U3-(R)-
chr 4: 166136290-166140835	+	400736_2												x														c4_A			95.5 99.8	BF684025 FN806834	973 647	619-8 1-647	U3-R gag
chr 5: 30522517-30531962	-	500144_2				x								x												K104 (0 EST)	15				98.3	FN806840	637	1-637	Gag
chr 6: 42969387-42979345	-	600301_2												x							x					6p21 (0 EST)					92.4	CN413597	649	196-649	Gag
chr 6: 78483381-78492802	-	600443_2				x								x												K109 (0 EST)		c6_A			98.9 99.7 98.3	BU632008 BQ899216 CR998259	576 902 762	576-18 1-832 762-1	U3-R-(U5) env U3-R
chr 6: 111682993-111683951	-	600549_2												x			x										25				96	BF684025	973	619-2	U3-(R)-
chr 7: 139899253-139900211	-	700516_2																x									28				99.9	CD244241	981	7147-1	U3-R
chr 9: 138794598-138798686	-	900426_2															x					x				9q34.3 (0 EST)					91.4	BM661867	534	494-24	U3-R-U5
chr 10: 6906147-6915609	-	1000026_2												x		x										10p14/HERV-K(C11a)		c10_A			94.3	BF684025	973	619-5	U3-(R)-
chr 10: 101570559-101571639	-	1000389_2												x		x											36				96.7	CR998259	762	762-70	U3-R
chr 10: 101571639-101577563	-	1000390_2												x	x				x									c10_B			98.3	FN806840	637	1-637	Gag
chr 11: 101071004-101080469	+	1100414_2				x								x														c11_A			98.5 100	BQ575726 CF227266	689 667	689-18 8-667	5'LTR env
chr 11: 118099606-118106093	-	1100465_2				x								x												11q23 (0 EST)		c11_B			99.7	CB850840	670	670-21	U3-R-U5
chr 12: 57007509-57016965	-	1200265_2				x								x												12q14		c12_A	H2035746		98.1 99.2	BM981862 BQ899216	707 902	707-17 1-719	U3-R env c-term
chr 13: 49071153-49072127	+	1300153_2												x													44				98.7	CD558661	874	91-874	U3-R-U5
chr 19: 42289389-42298906	-	1900211_2					x														x					19q13.1					99.5	BP395740	448	1-410	R-U5
chr 21: 14114072-14115040	+	2100005_2															x							x			52				93.3	BM989989	704	700-18	U3-R-U5
chr 21: 18857493-18863833	-	2100023_2				x								x														c21_A			97.8	BU618928	706	706-18	U3-R
chr 22: 22208249-22219093	+	2200033_2															x									22q11					99.4	AW003821	506	1-506	interdomain between duplicated 5'LTRs
																															scores in grey are <97%
																																This study	Stauffer 2004 (table 1)	Buzdin 2006 (table 1)	Flockerzi 2008 (table1)	Gimenez 2010 (table 2)
																															Number of elements	327	32	54	23	3
																															Number of shared elements		22 (11*)	32	19	2
																															Number of active elements		14(7*)	6	12	1
																															Correlation		64%(64%*)	0.19	0.63	0.5
																																	* associated with EST
